# Supplementary material for: Association between Sexual Activity during Pregnancy, Pre- and Early-Term Birth, and Vaginal Cytokine Inflammation: A Prospective Study of Black Women
Source: MDPI journal article supplement (doi:10.3390/healthcare11141995), 2023-07-11
Supplement: s1 [file s1]

**Supplementary Table S1 Descriptive statistics of ratios between pro- and anti- inflammatory cytokines by birth outcomes**

| Ratio <sup>1</sup>              | Spontaneous<br>Preterm Birth | Spontaneous<br>Early Term Birth | Full-term Birth<br>(referent) |
|---------------------------------|------------------------------|---------------------------------|-------------------------------|
| Serum IFN $\gamma$ /IL10 (T1)   | 2.07 $\pm$ 1.03              | 2.09 $\pm$ 0.93                 | 2.12 $\pm$ 0.70               |
| Serum IFN $\gamma$ /IL10 (T2)   | 1.82 $\pm$ 1.11              | 1.91 $\pm$ 0.84                 | 1.97 $\pm$ 0.87               |
| Vaginal IFN $\gamma$ /IL10 (T1) | 2.74 $\pm$ 1.67              | 2.84 $\pm$ 1.93                 | 3.07 $\pm$ 1.74               |
| Vaginal IFN $\gamma$ /IL10 (T2) | 3.09 $\pm$ 1.66              | 3.50 $\pm$ 1.56                 | 2.81 $\pm$ 1.89               |
| Serum IL6/IL10 (T1)             | 0.42 $\pm$ 0.73              | 0.66 $\pm$ 1.01                 | 0.76 $\pm$ 0.86               |
| Serum IL6/IL10 (T2)             | 0.42 $\pm$ 0.90              | 0.75 $\pm$ 0.96                 | 0.74 $\pm$ 0.88               |
| Vaginal IL6/IL10 (T1)           | 3.67 $\pm$ 2.35              | 3.58 $\pm$ 2.12                 | 3.47 $\pm$ 2.04               |
| Vaginal IL6/IL10 (T2)           | 2.75 $\pm$ 1.70              | 3.43 $\pm$ 2.11                 | 2.73 $\pm$ 2.16               |
| Serum CRPmg (T1)                | -1.02 $\pm$ 1.19             | -0.98 $\pm$ 1.46                | -0.84 $\pm$ 1.28              |
| Serum CRPmg (T2)                | -0.91 $\pm$ 1.03             | -0.96 $\pm$ 1.31                | -0.61 $\pm$ 1.07              |
| Vaginal CRPmg (T1)              | -9.32 $\pm$ 1.84             | -9.31 $\pm$ 1.85                | -9.43 $\pm$ 2.01              |
| Vaginal CRPmg (T2)              | -9.74 $\pm$ 1.83             | -9.31 $\pm$ 1.97                | -9.30 $\pm$ 1.95              |
| Serum TNFa/IL10 (T1)            | 1.84 $\pm$ 0.60              | 1.89 $\pm$ 0.71                 | 2.02 $\pm$ 0.63               |
| Serum TNFa/IL10 (T2)            | 1.83 $\pm$ 0.76              | 1.95 $\pm$ 0.82                 | 2.13 $\pm$ 0.79               |
| Vaginal TNFa/IL10 (T1)          | 1.91 $\pm$ 1.68              | 1.87 $\pm$ 1.90                 | 1.96 $\pm$ 1.52               |
| Vaginal TNFa/IL10 (T2)          | 1.48 $\pm$ 1.69              | 2.07 $\pm$ 1.94                 | 1.65 $\pm$ 1.57               |

<sup>1</sup> Ratios between pro- and anti- inflammatory cytokines were log-transformed to normalize the data distribution. T1 and T2 stand for early and late pregnancy, respectively.
